# Supplementary material for: A programmed hydrogen bonding array self-assembles into a polymeric zipper-like architecture
Source: Royal Society of Chemistry journal article supplement (doi:10.1039/b515559b), 2006-01-01
Supplement: b515559b.pdf [file b515559b.pdf]

## Electronic Supplementary Information (ESI)

### **A programmed hydrogen bonding array self-assembles into a polymeric pipper-like architecture**

Yong Yang,<sup>a,b</sup> Ya-Zhou Zhang,<sup>a,b</sup> Ya-Lin Tang<sup>a</sup> and Chuan-Feng Chen<sup>\*a</sup>

<sup>a</sup> *Laboratory of Chemical Biology, Center for Molecular Science, Institute of Chemistry, Chinese Academy of Sciences, Beijing 100080, P. R. China. E-mail: cchen@iccas.ac.cn*

<sup>b</sup> *Graduate School, Chinese Academy of Sciences, Beijing 100039, China.*

### **Contents**

|                                                                                            |            |
|--------------------------------------------------------------------------------------------|------------|
| <b>Experimental preparations for molecule 1 and 2</b>                                      | <b>S2</b>  |
| <b>Thermal ellipsoid representation of X-ray structures of 1 and 2</b>                     | <b>S4</b>  |
| <b>Packing diagrams</b>                                                                    | <b>S5</b>  |
| <b>NOESY spectra for molecule 1 and 2</b>                                                  | <b>S6</b>  |
| <b>Diluting <sup>1</sup>H NMR experiments data and calculation of association constant</b> | <b>S8</b>  |
| <b>Variable-temperature <sup>1</sup>H NMR experiments data</b>                             | <b>S12</b> |

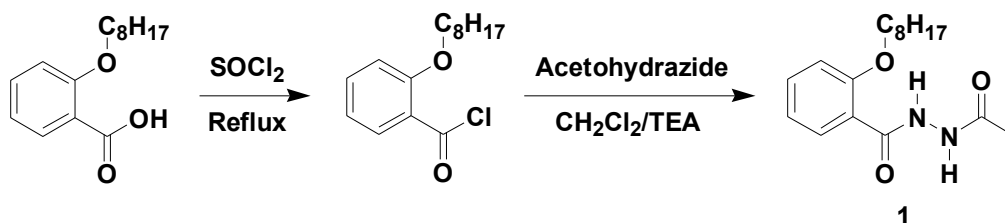

***N'*-Acetyl-2-(octyloxy)benzohydrazide (1):** 2-Octyloxybenzoic acid<sup>1</sup> (1.00 g, 4 mmol) was dissolved in thionyl chloride (10 mL), and the mixture was heated under reflux with a calcium chloride drying tube for 8 hours. The excess thionyl chloride was removed under reduced pressure. The crude acid chloride was directly used for the next step without further purification. A solution of the above-prepared acid chloride in CH<sub>2</sub>Cl<sub>2</sub> (10 mL) was dropwise added to a solution of acetohydrazide (0.6 g, 8 mmol) and triethylamine (1.1 mL, 8 mmol) in CH<sub>2</sub>Cl<sub>2</sub> (10 mL) over a period of 10 minutes with ice-water bath equipped. Then the ice-water bath was removed, and the reaction mixture was stirred at room temperature for 1 hour. More CH<sub>2</sub>Cl<sub>2</sub> (30 mL) was added. The solution was then washed with diluted 2N HCl (20 mL), saturated Na<sub>2</sub>CO<sub>3</sub> aqueous solution (20 mL) and saturated brine (20 mL) successively. The organic layer was dried over anhydrous Na<sub>2</sub>SO<sub>4</sub>. The solvent was evaporated under reduce pressure. The crude product was recrystallized from methanol to give 1.18 g (96.4 %) of **1** as a white solid. Mp: 102-3 °C. <sup>1</sup>H NMR (CDCl<sub>3</sub>): δ 11.04 (d, *J*=7.4 Hz, 1H, **H**-N), 10.31 (d, *J*=7.3 Hz, 1H, **H**-N), 8.18 (q, *J*=1.2 Hz, 7.7 Hz, 1H, **H**-Ar), 7.49 (t, *J*=8.3 Hz, 1H, **H**-Ar), 7.07 (t, *J*=7.5 Hz, 1H, **H**-Ar), 7.00 (d, *J*=8.3 Hz, 1H, **H**-Ar), 4.17 (t, *J*=6.7 Hz, 2H, CH<sub>2</sub>O), 2.16 (s, 3H, COCH<sub>3</sub>), 2.00-2.06 (m, 2H, CH<sub>2</sub>), 1.48-1.53 (m, 2H, CH<sub>2</sub>), 1.36-1.41 (m, 2H, CH<sub>2</sub>), 1.27-1.32 (m, 6H, CH<sub>2</sub>), 0.88 (t, *J*=6.6 Hz, 3H, CH<sub>3</sub>). <sup>13</sup>C NMR (CDCl<sub>3</sub>): δ 165.2, 160.1, 157.3, 133.5, 131.8, 121.1, 118.7, 112.3, 69.6, 31.8, 29.21, 29.15, 28.9, 26.0, 22.6, 20.6, 14.1. IR (KBr, cm<sup>-1</sup>): 3345.89, 3190.65, 2923.56, 2853.17, 1605.45, 1475.28, 1286.29, 1230.36. MS (EI): *m/z* 306 (M<sup>+</sup>), 233 (100), 121. Elemental analysis calcd (%) for C<sub>17</sub>H<sub>26</sub>N<sub>2</sub>O<sub>3</sub>: C 66.64, H 8.55, N 9.14; found: C 66.66, H 8.70, N 8.99.

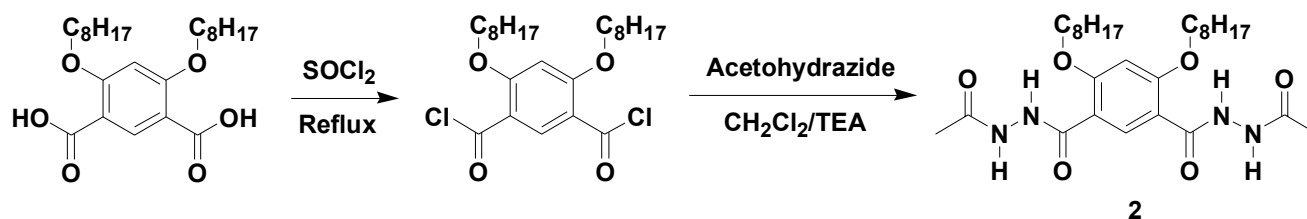

***N'*, *N'*-Diacetyl-4,6-bis(octyloxy)benzene-1,3-dihydrazide (2):** This compound was prepared as a white solid (96.7 %) from 4,6-bis (octyloxy)benzene-1,3-dioic acid<sup>2</sup> and acetohydrazide according to the procedure described for **1**. Mp: 201-2 °C. <sup>1</sup>H NMR (CDCl<sub>3</sub>): δ 10.65 (d, *J*=7.6 Hz, 2H, **H-N**), 9.55 (d, *J*=7.4 Hz, 2H, **H-N**), 9.00 (s, 1H, Ar-**H**), 6.51 (s, 1H, Ar-**H**), 4.21 (t, *J*=6.7 Hz, 4H, CH<sub>2</sub>O), 2.15 (s, 6H, COCH<sub>3</sub>), 2.04-2.08 (m, 4H, CH<sub>2</sub>), 1.50-1.56 (m, 4H, CH<sub>2</sub>), 1.38-1.44 (m, 4H, CH<sub>2</sub>), 1.24-1.35 (m, 12H, CH<sub>2</sub>), 0.89 (t, *J*=6.8 Hz, 6H, CH<sub>3</sub>). <sup>13</sup>C NMR (CDCl<sub>3</sub>): δ 165.0, 161.0, 159.1, 136.7, 112.4, 96.23, 70.3, 31.8, 29.2, 29.1, 28.8, 26.0, 22.6, 20.7, 14.1. IR (KBr, cm<sup>-1</sup>): 3325.64, 3204.15, 2957.3, 2927.41, 2854.13, 1618.95, 1543.74, 1484.67, 1400.07, 1282.43, 1264.11. MS (EI): *m/z* 534 (*M*<sup>+</sup>), 461 (100). Elemental analysis calcd (%) for C<sub>28</sub>H<sub>46</sub>N<sub>4</sub>O<sub>6</sub>: C 62.90, H 8.67, N 10.48; found: C 62.77, H 8.71, N 10.52.

(1) Zhao, X.; Wang, X.-Z.; Jiang, X.-K.; Chen, Y.-Q.; Li, Z.-T.; Chen, G.-J. *J. Am. Chem. Soc.* **2003**, *125*, 15128-15139.

(2) Yuan, L.; Feng, W.; Yamato, K.; Sanford, A. R.; Xu, D.; Guo, H.; Gong, B. *J. Am. Chem. Soc.* **2004**, *126*, 11120-11121.

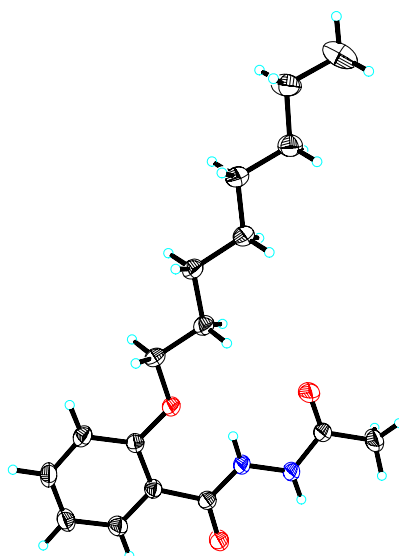

**Figure S1.** Thermal ellipsoid representation of X-ray structure of **1**.

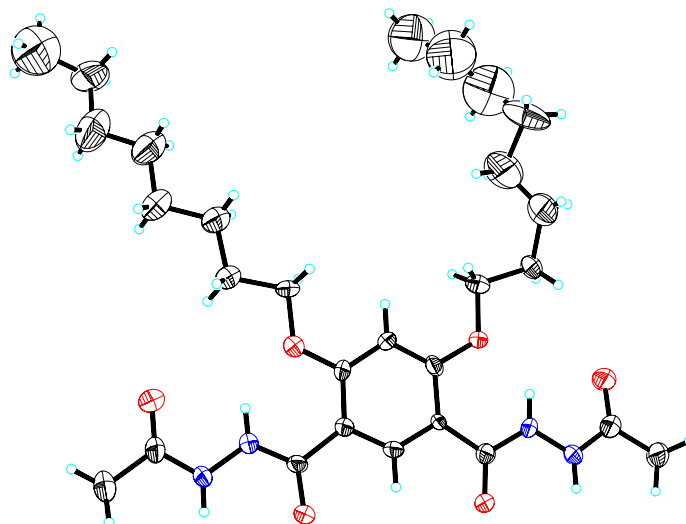

**Figure S2.** Thermal ellipsoid representation of X-ray structure of **2**.

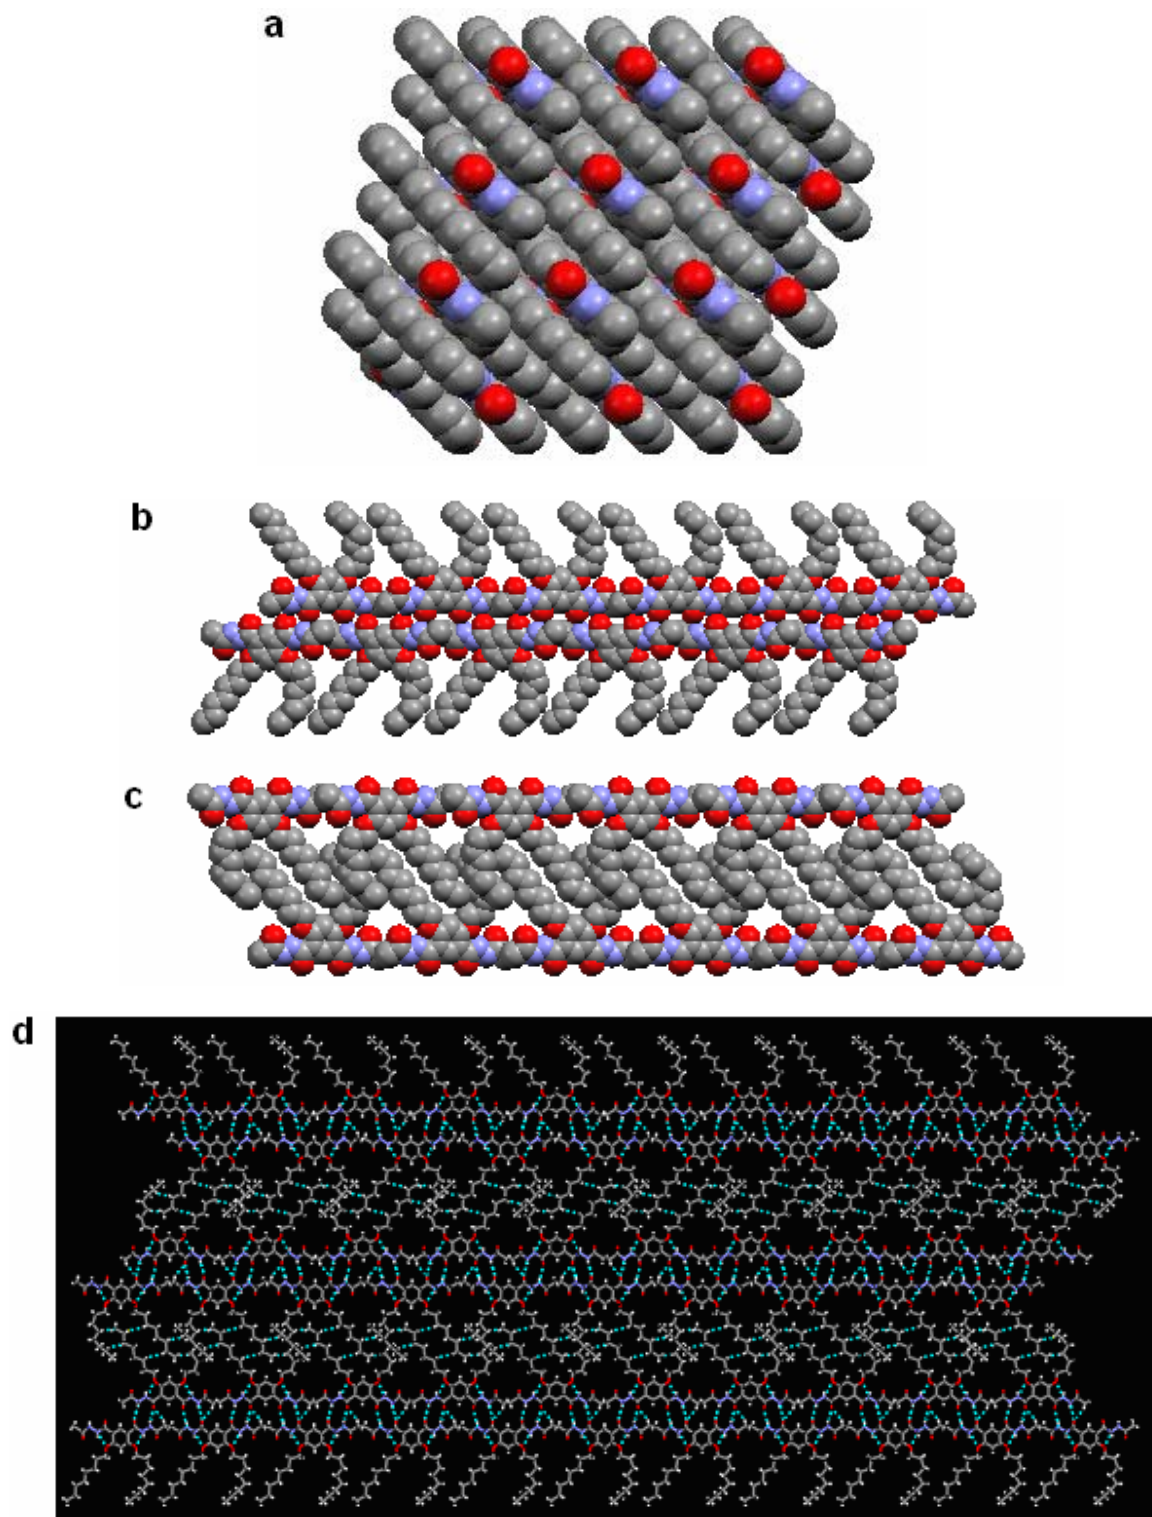

**Figure S3.** (a) Crystal packing of **1** viewed along the *b*-axis. Crystal packing of **2** viewed along the *a*-axis: (b) zipper locked by hydrogen bonding and (c) zipper locked by van der Waals interaction. (d) Illustration of lamellar structure of **2**.

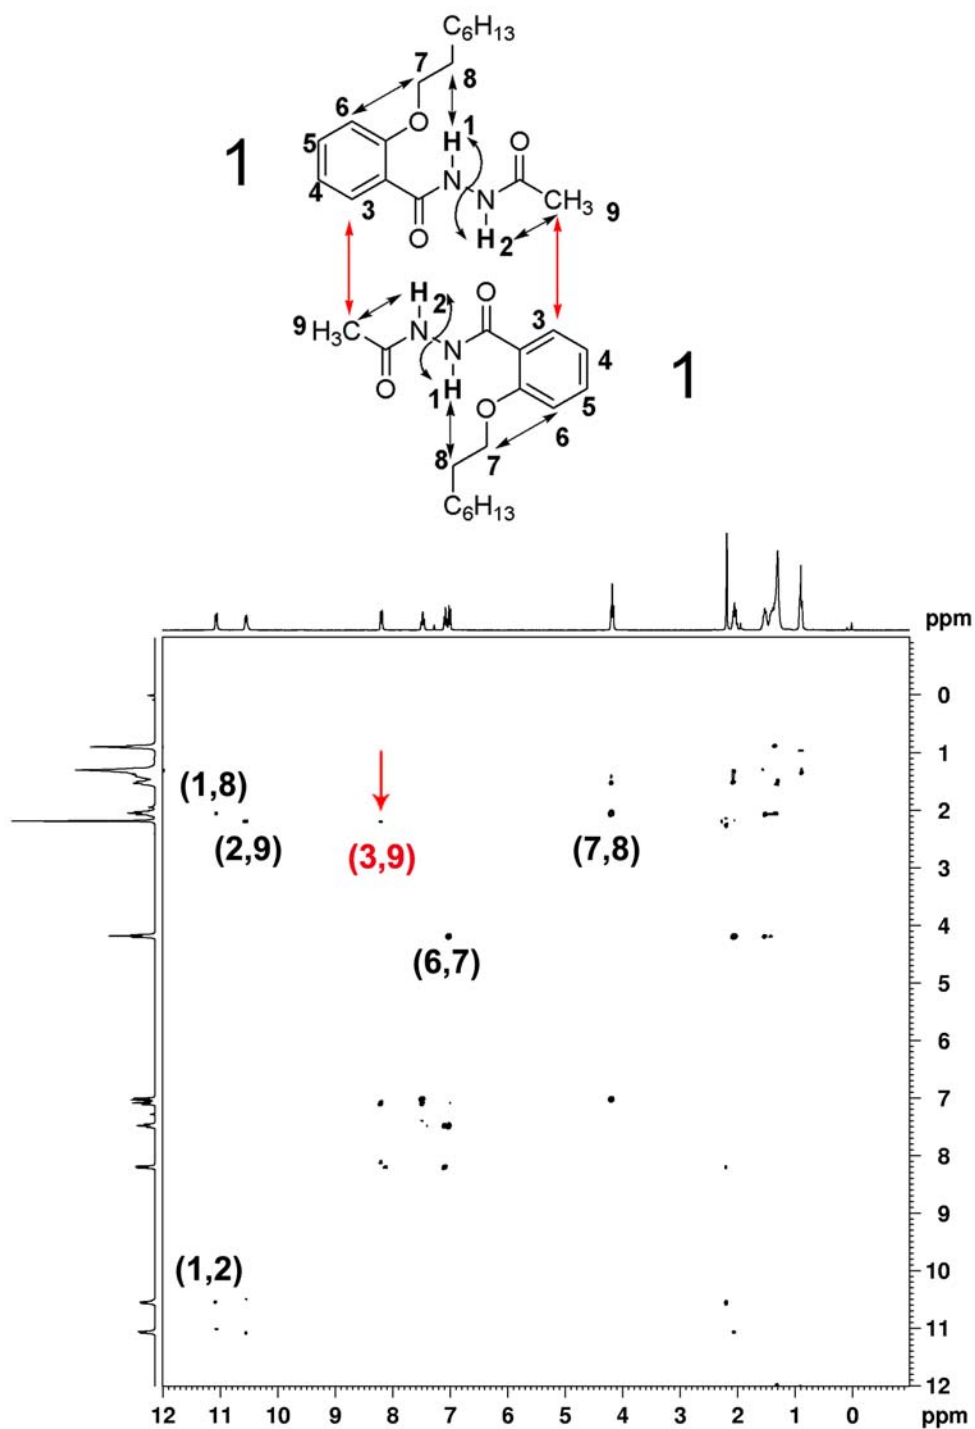

**Figure S4.** NOESY spectrum of **1** (300 MHz, CDCl<sub>3</sub>).

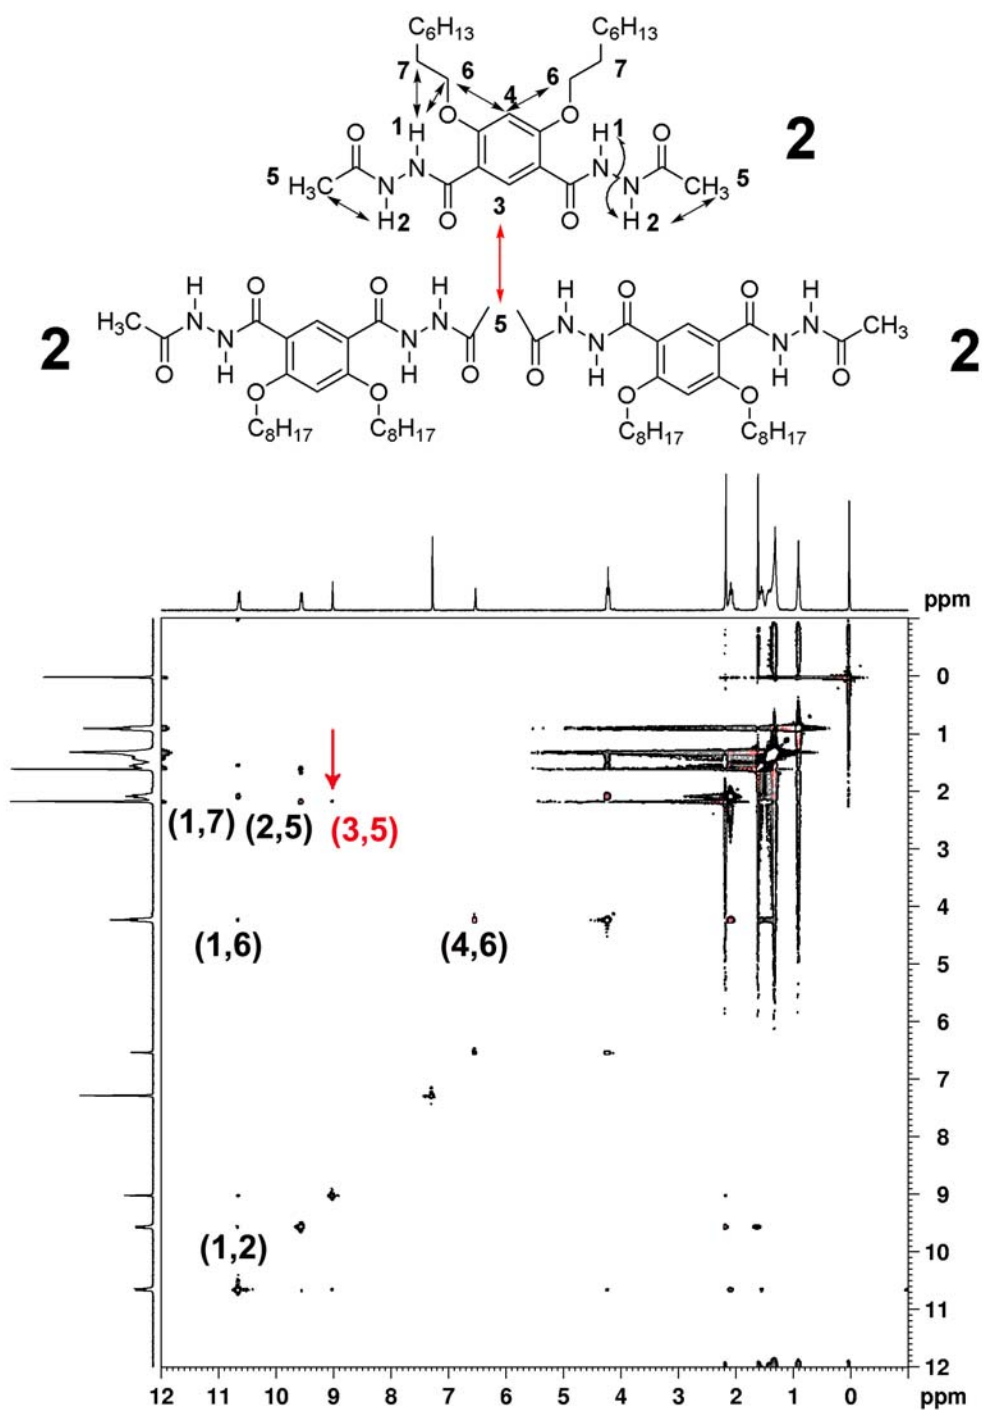

**Figure S5.** NOESY spectrum of **2** (300 MHz, CDCl<sub>3</sub>).

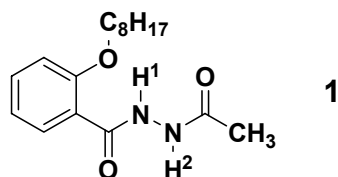

**Table S1.** Chemical shifts of H<sup>1</sup> and H<sup>2</sup> at different concentrations.

| Concentration<br>(mM)                                  | 200    | 100    | 50     | 40     | 30     | 20     | 10     | 5      | 2.5    | 1      | 0.5    |
|--------------------------------------------------------|--------|--------|--------|--------|--------|--------|--------|--------|--------|--------|--------|
| Chemical shift<br>of H <sup>1</sup> (ppm) <sup>a</sup> | 11.060 | 11.043 | 11.007 | 10.989 | 10.983 | 10.965 | 10.936 | 10.906 | 10.890 | 10.878 | 10.872 |
| Chemical shift<br>of H <sup>2</sup> (ppm)              | 10.547 | 10.310 | 9.962  | 9.831  | 9.732  | 9.555  | 9.281  | 9.028  | 8.890  | 8.794  | 8.756  |

(a) TMS as inner standard.

**Nonlinear regression analysis is based on the following equation:**<sup>3,4</sup>

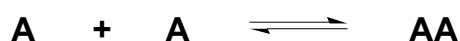

$$K_d = \frac{[AA]}{[A]^2}$$

$$[A] = [A]_0 - 2[AA]$$

$$[AA] = \frac{4K_d[A]_0 + 1 - \sqrt{8K_d[A]_0 + 1}}{8K_d}$$

$$\delta_{obs} = \frac{2[AA]}{[A]_0} \delta_d + \frac{[A]}{[A]_0} \delta_f$$

$$= \delta_f + (\delta_d - \delta_f) \frac{4K_d[A]_0 + 1 - \sqrt{8K_d[A]_0 + 1}}{4K_d[A]_0}$$

[A] : the concentration of unbound free species

[A]<sub>0</sub> : the total concentration

[AA] : the concentration of dimer

K<sub>d</sub> : the dimerization constant

δ<sub>d</sub> : the limiting bound chemical shift of the dimer

δ<sub>f</sub> : the free chemical shift

δ<sub>obs</sub> : chemical shift measured by experiment



The dimerization constant was obtained by fitting the NMR data into the above equation with Origin's nonlinear regression method (Version: Origin 6.1) based on Levenberg-Marquardt (LM) algorithm on a PC computer.

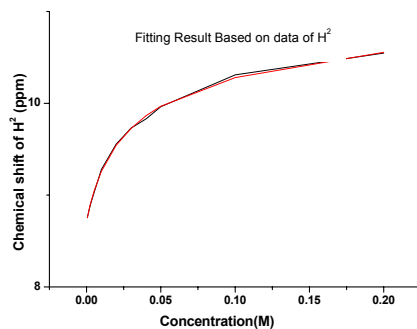

$$\delta_f = 8.71 \pm 0.01$$

$$\delta_d = 11.45 \pm 0.05$$

$$K_d = 15.60 \pm 0.93 M^{-1}$$

**Figure S6.** Fitting result based on H<sup>2</sup>. Black: experimental data; Red: fitting result.

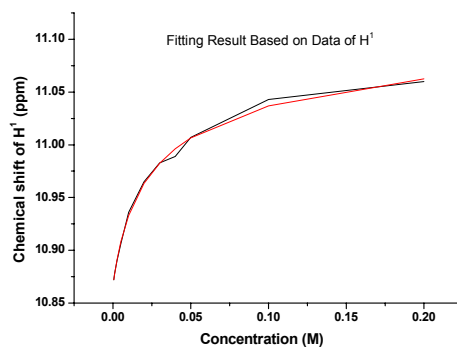

$$\delta_f = 10.867 \pm 0.003$$

$$\delta_d = 11.144 \pm 0.008$$

$$K_d = 20.66 \pm 2.35 M^{-1}$$

**Figure S7.** Fitting result based on H<sup>1</sup>. Black: experimental data; Red: fitting result.

- 
- (3) Wilcox, C. S. In *Frontiers in Supramolecular Organic Chemistry and Photochemistry*; Schneider, H.-J., Durr, H., Eds.; VCH: New York, 1991; pp123-143.
- (4) Bisson, A. P.; Carver, F. J.; Eggleston, D. S.; Haltiwanger, R. C.; Hunter, C. A.; Livingstone, D. L.; McCabe, J. F.; Rotger, C.; Rowan, A. E. *J. Am. Chem. Soc.* **2000**, *122*, 8856-8868.

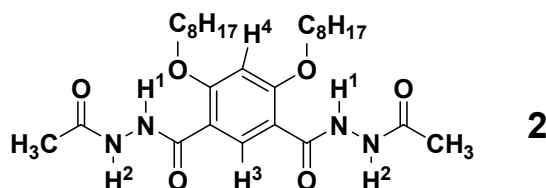

**Table S2.** Chemical shifts of H<sup>1</sup> and H<sup>2</sup> at different concentrations.

| Concentration<br>(mM)                                  | 5      | 4.5    | 4      | 3.5    | 3      | 2.5    | 2      | 1.5    | 1      | 0.5    |
|--------------------------------------------------------|--------|--------|--------|--------|--------|--------|--------|--------|--------|--------|
| Chemical shift<br>of H <sup>1</sup> (ppm) <sup>a</sup> | 10.627 | 10.627 | 10.624 | 10.620 | 10.616 | 10.611 | 10.605 | 10.597 | 10.588 | 10.578 |
| Chemical shift<br>of H <sup>2</sup> (ppm)              | 9.419  | 9.396  | 9.366  | 9.320  | 9.286  | 9.224  | 9.158  | 9.130  | 8.986  | 8.897  |

a: TMS as inner standard.

The association constant for chain extension of the aggregate was obtained by fitting the NMR data into the above equation with Origin's nonlinear regression method (Version: Origin 6.1) based on Levenberg-Marquardt (LM) algorithm on a PC computer.

$$[Agg] = [A]_0 \left\{ 1 - \frac{2}{1 + \sqrt{1 + 4K_a[A]_0}} \right\}$$

$$[A] = [A]_0 - [Agg]$$

$$\delta_{obs} = \frac{[Agg]}{[A]_0} \delta_b + \frac{[A]}{[A]_0} \delta_f$$

$$= \delta_f + (\delta_f - \delta_b) \frac{2}{1 + \sqrt{4K_a[A]_0} + 1}$$

$[A]_0$ : the total concentration

$[A]$ : the concentration of sites which are unbound

$[Agg]$ : the concentration of sites involved in intermolecular interactions in the aggregate

$K_a$ : the association constant for chain extension of the aggregate

$\delta_b$ : the limiting bound chemical shift of the bound sites in the aggregate

$\delta_f$ : the free chemical shift

$\delta_{obs}$ : chemical shift measured by experiments

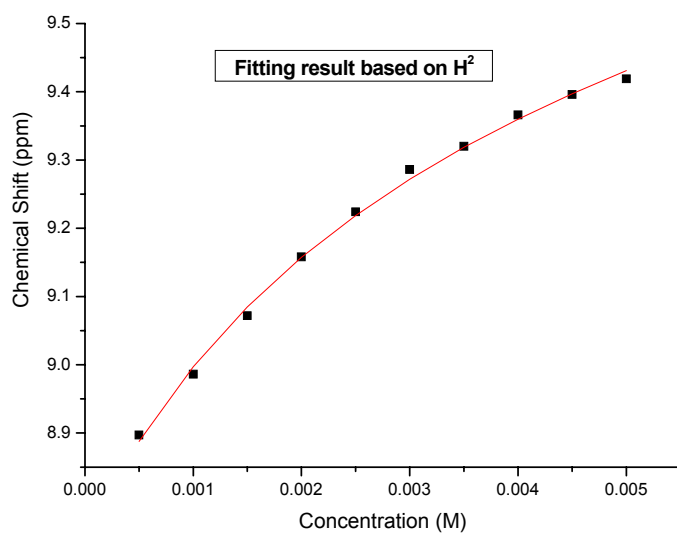

$$\delta_f = 8.742 \pm 0.024$$

$$\delta_b = 10.636 \pm 0.165$$

$$K_a = 179.561 \pm 38.604 M^{-1}$$

**Figure S8.** Fitting result based on  $H^2$ . Black: experimental data; Red: fitting result.

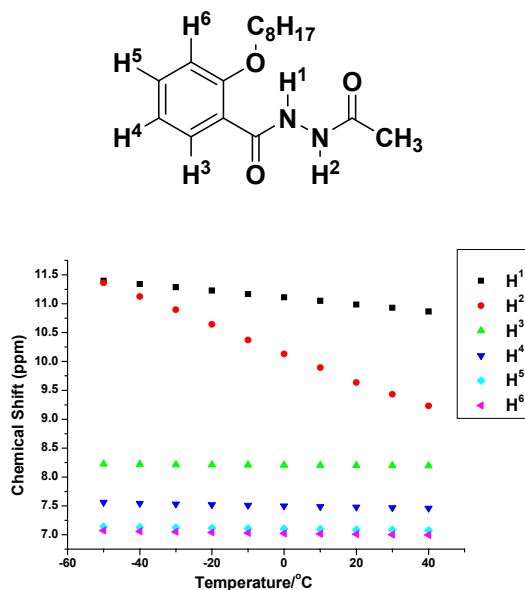

Temperature coefficient of H<sup>1</sup>:  $-5.92 \times 10^{-3}$  ppm/K.

Temperature coefficient of H<sup>2</sup>:  $-2.41 \times 10^{-2}$  ppm/K.

**Figure S9.** Chemical shifts of protons of **1** at different temperatures. TMS as inner standard.

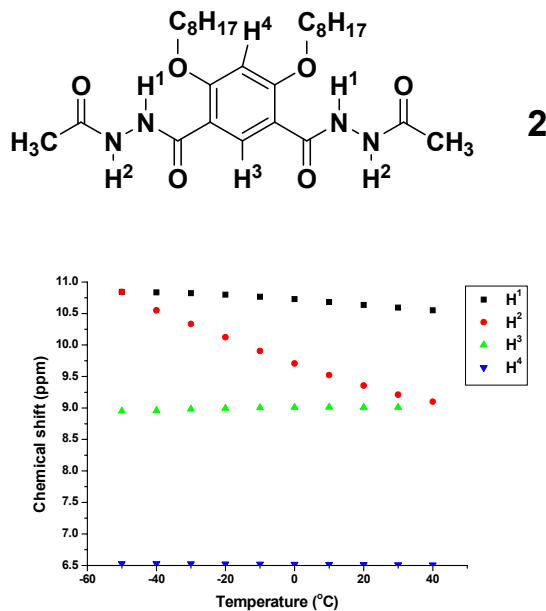

Temperature coefficient of H<sup>1</sup>:  $-3.4 \times 10^{-3}$  ppm/K.

Temperature coefficient of H<sup>2</sup>:  $-1.94 \times 10^{-2}$  ppm/K.

**Figure S10.** Chemical shifts of protons of **2** at different temperatures. TMS as inner standard.
